# Supplementary material for: Synthesis and structural analysis of tungsten-carbonyl dimers bridged with oligo(2,5-dialkoxy-1,4-phenylene vinylene)s through pyridine coordination
Source: Royal Society of Chemistry journal article supplement (doi:10.1039/c5dt02726h), 2015-01-01
Supplement: c5dt02726h1.pdf [file c5dt02726h1.pdf]

Electronic Supplementary Information (ESI)

Synthesis and Structural Analysis of Tungsten-Carbonyl Dimers Bridged with Oligo(2,5-dialkoxy-1,4-phenylene vinylene)s through Pyridine Coordination

*Sakkawet Yorsaeng,<sup>a,b</sup> Ken Tsutsumi,<sup>a</sup> Boonyarach Kitiyanan<sup>b\*</sup> and Kotohiro Nomura,<sup>a,c,\*</sup>*

<sup>a</sup> *Department of Chemistry, Tokyo Metropolitan University, 1-1 Minami Osawa, Hachioji, Tokyo 192-0397, Japan;* <sup>b</sup> *The Petroleum and Petrochemical College, Chulalongkorn University, Bangkok 10330, Thailand;* <sup>c</sup> *Advanced Catalytic Transformation for Carbon Utilization (ACT-C), Japan Science and Technology Agency (JST), Saitama 332-0012, Japan*

NMR and IR spectra for (a) **[W(CO)<sub>5</sub>]<sub>2</sub>-Bpy (1)**, (b) **[W(CO)<sub>5</sub>]<sub>2</sub>-(1PV-Py<sub>2</sub>) (2)**, (c) **[W(CO)<sub>5</sub>]<sub>2</sub>-(3PV-Py<sub>2</sub>) (3)**.

Molecular packings of (a) **[W(CO)<sub>5</sub>]<sub>2</sub>-Bpy (1)**, (b) **[W(CO)<sub>5</sub>]<sub>2</sub>-(1PV-Py<sub>2</sub>) (2)**, (c) **[W(CO)<sub>5</sub>]<sub>2</sub>-(3PV-Py<sub>2</sub>) (3)** in the crystal unit cell.

Disordered O, Si, and C atoms of OSi(*i*-Pr)<sub>3</sub> groups in **[W(CO)<sub>5</sub>]<sub>2</sub>-(3PV-Py<sub>2</sub>) (3)**. A table describing the detail parameters including the occupancy of each atoms.

CIF files for **[W(CO)<sub>5</sub>]-Bpy (1)**, **[W(CO)<sub>5</sub>]- (1PV-Py<sub>2</sub>) (2)**, and **[W(CO)<sub>5</sub>]- (3PV-Py<sub>2</sub>) (3)**, deposited as CCDC1409638-1409640.

\*Corresponding Authors, tel.: +81-42-677-2547, fax: +81-42-677-2547, e-mail: ktnomura@tmu.ac.jp (K. Nomura) or Boonyarach.K@chula.ac.th (B. Kitiyanan)

1-1. NMR spectra for  $[\text{W}(\text{CO})_5]_2\text{-Bpy}$  (1),  $[\text{W}(\text{CO})_5]_2\text{-(1PV-Py}_2)$  (2), and  $[\text{W}(\text{CO})_5]_2\text{-(3PV-Py}_2)$  (3).

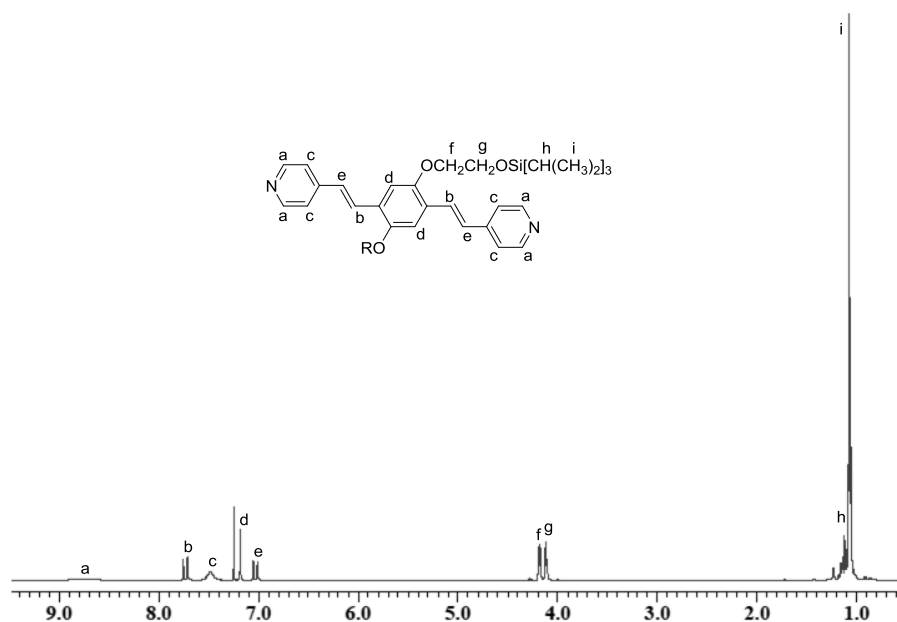

**Figure S1-1.**  $^1\text{H}$  NMR spectrum (in  $\text{CDCl}_3$  at 25 °C) of **1PV-Py<sub>2</sub>**.

$^1\text{H}$  NMR ( $\text{CDCl}_3$  at 25 °C):  $\delta$  8.77 (br, 4H), 7.74 (d, 2H), 7.49 (br, 4H), 7.20 (s, 2H), 7.04 (d, 2H), 4.20 (t, 4H), 4.13 (t, 4H), 1.13 (m, 6H), 1.08 (d, 36H).

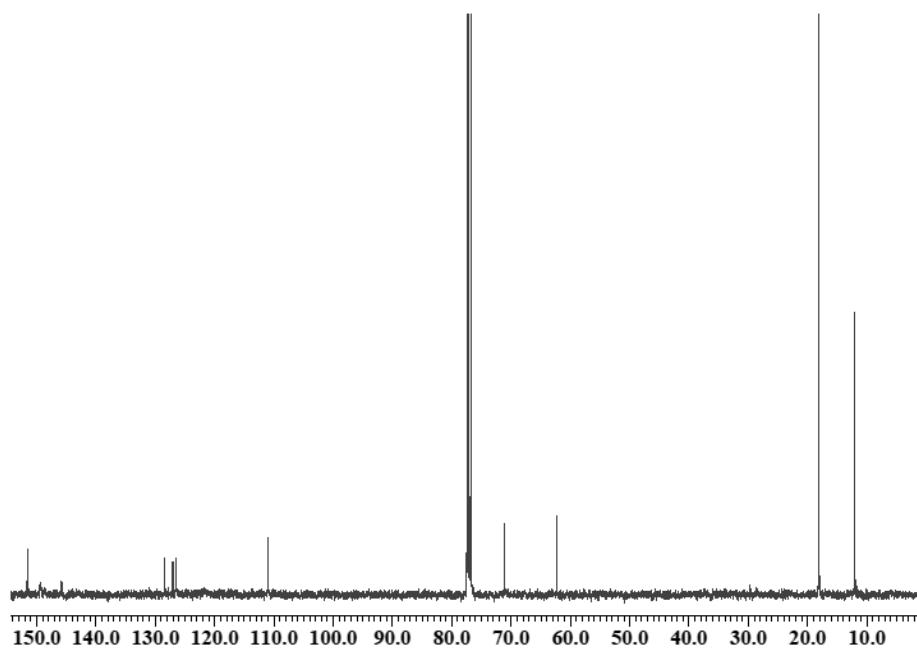

**Figure S1-2.**  $^{13}\text{C}$  NMR spectrum (in  $\text{CDCl}_3$  at 25 °C) of **1PV-Py<sub>2</sub>**.

$^{13}\text{C}$  NMR ( $\text{CDCl}_3$  at 25 °C):  $\delta$  151.5, 149.3, 145.7, 131.0, 128.3, 127.0, 126.4, 110.8, 71.0, 62.3, 18.0, 12.0.

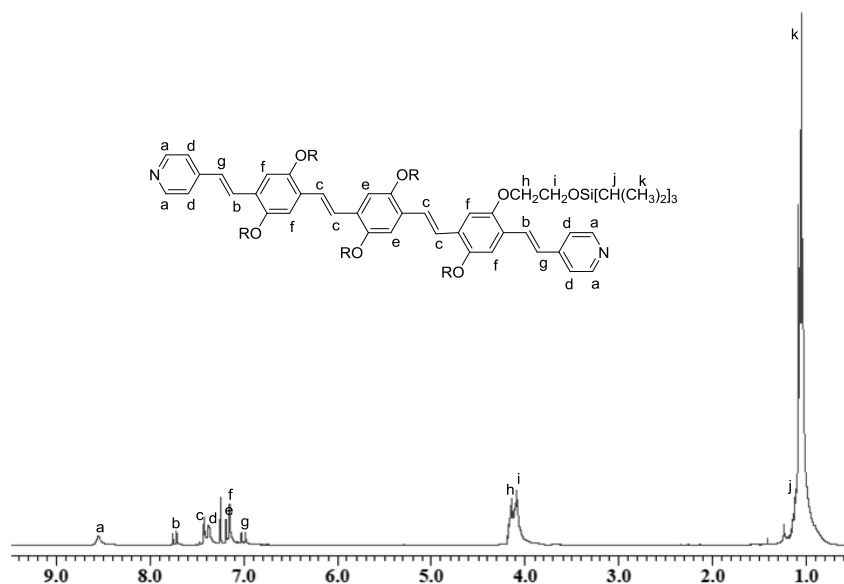

**Figure S1-3.**  $^1\text{H}$  NMR spectrum (in  $\text{CDCl}_3$  at  $25\text{ }^\circ\text{C}$ ) of **3PV-Py<sub>2</sub>**.

$^1\text{H}$  NMR ( $\text{CDCl}_3$  at  $25\text{ }^\circ\text{C}$ ):  $\delta$  8.56 (br, 4H), 7.75 (d, 2H), 7.43 (m, 4H), 7.39 (br, 4H), 7.20 (s, 2H), 7.16 (s, 4H), 7.01 (d, 2H), 4.16 (m, 12H), 4.10 (m, 12H), 1.12 (m, 18H), 1.06 (m, 108H).

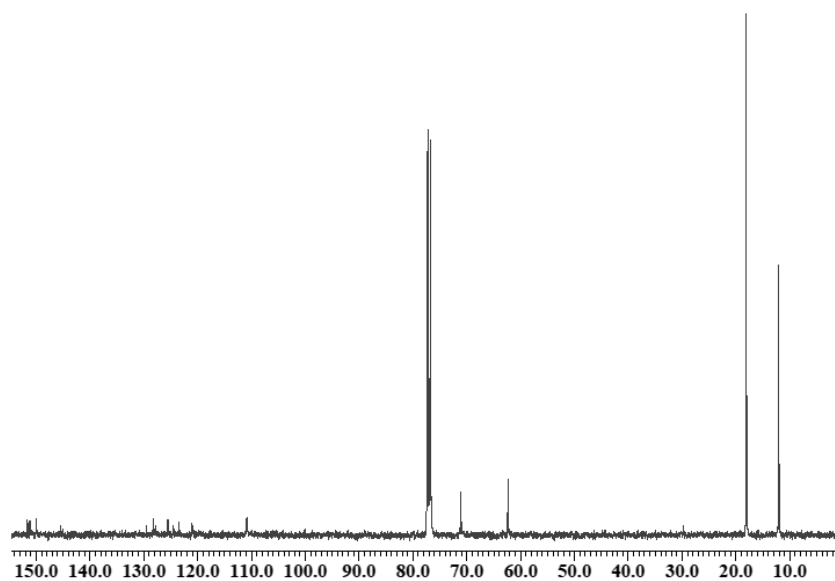

**Figure S1-4.**  $^{13}\text{C}$  NMR spectrum (in  $\text{CDCl}_3$  at  $25\text{ }^\circ\text{C}$ ) of **3PV-Py<sub>2</sub>**.

$^{13}\text{C}$  NMR ( $\text{CDCl}_3$  at  $25\text{ }^\circ\text{C}$ ):  $\delta$  151.5, 151.1, 150.9, 149.9, 145.4, 130.7, 129.4, 128.1, 127.8, 125.5, 124.4, 123.4, 120.9, 110.8, 71.0, 62.3, 18.0, 12.0.

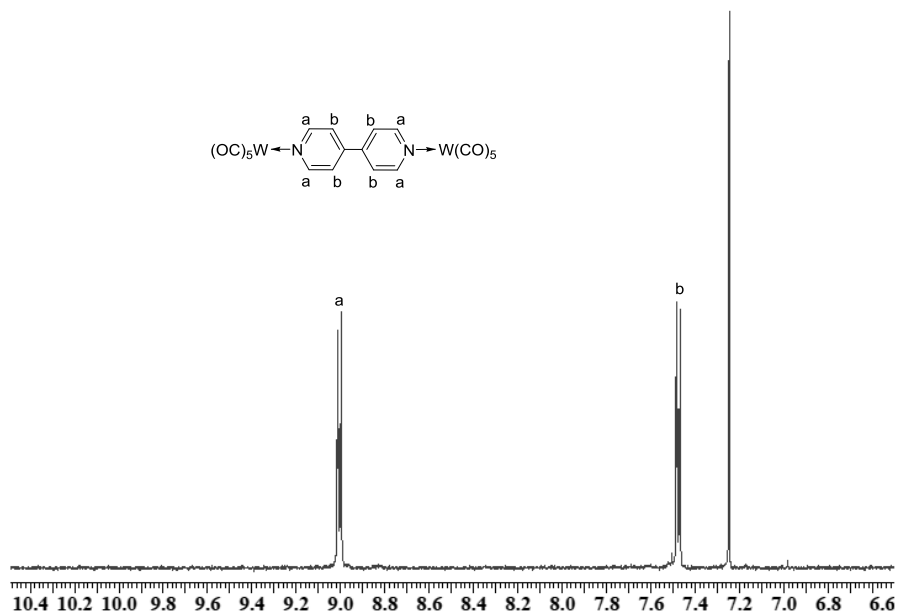

**Figure S1-5.**  $^1\text{H}$  NMR spectrum (in  $\text{CDCl}_3$  at  $25^\circ\text{C}$ ) of  $[\text{W}(\text{CO})_5]_2\text{-Bpy}$ .

$^1\text{H}$  NMR ( $\text{CDCl}_3$  at  $25^\circ\text{C}$ ):  $\delta$  9.02 (d, 4H), 7.49 (d, 4H).

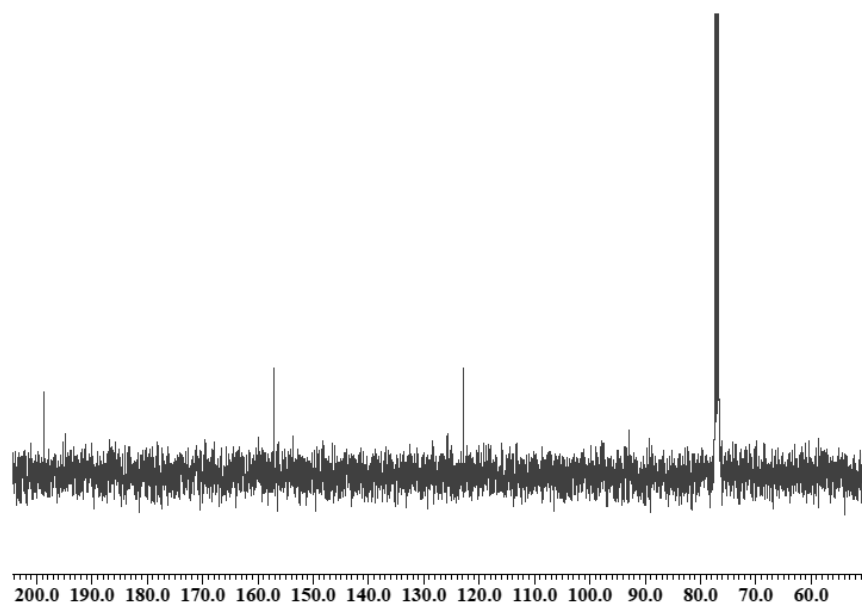

**Figure S1-6.**  $^{13}\text{C}$  NMR spectrum (in  $\text{CDCl}_3$  at  $25^\circ\text{C}$ ) of  $[\text{W}(\text{CO})_5]_2\text{-Bpy}$ .

$^{13}\text{C}$  NMR ( $\text{CDCl}_3$  at  $25^\circ\text{C}$ ):  $\delta$  198.6, 157.1, 122.8.

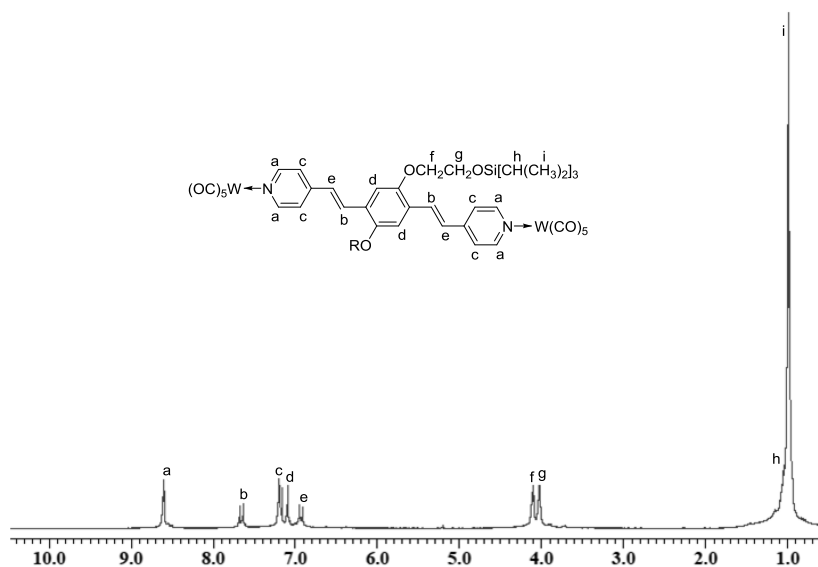

**Figure S1-7.**  $^1\text{H}$  NMR spectrum (in  $\text{CDCl}_3$  at  $25\text{ }^\circ\text{C}$ ) of  $[\text{W}(\text{CO})_5]_2\text{-(1PV-Py}_2\text{)}$ .

$^1\text{H}$  NMR ( $\text{CDCl}_3$  at  $25\text{ }^\circ\text{C}$ ):  $\delta$  8.70 (d, 4H), 7.75 (d, 2H), 7.29 (d, 4H), 7.19 (s, 2H), 7.03 (d, 2H), 4.21 (t, 4H), 4.12 (t, 4H), 1.14 (m, 6H), 1.09 (d, 36H).

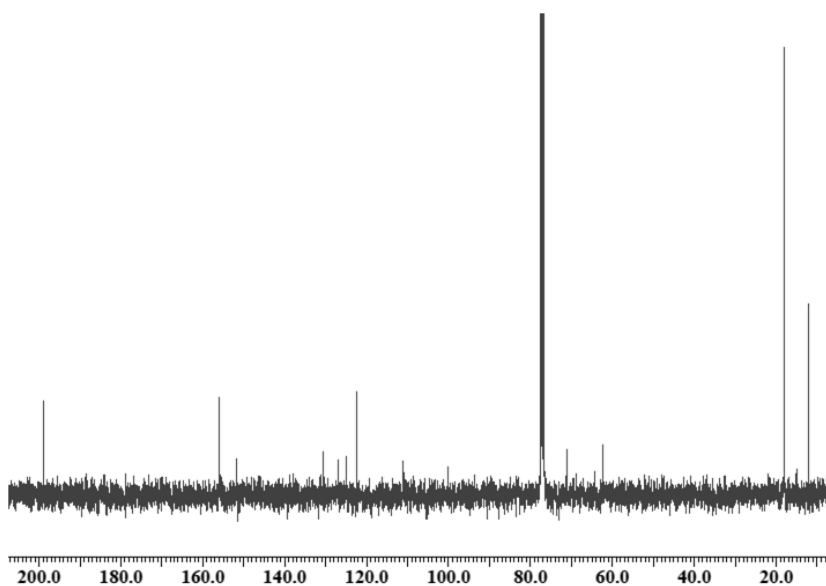

**Figure S1-8.**  $^{13}\text{C}$  NMR spectrum (in  $\text{CDCl}_3$  at  $25\text{ }^\circ\text{C}$ ) of  $[\text{W}(\text{CO})_5]_2\text{-(1PV-Py}_2\text{)}$ .

$^{13}\text{C}$  NMR ( $\text{CDCl}_3$  at  $25\text{ }^\circ\text{C}$ ):  $\delta$  198.9, 155.9, 151.8, 130.4, 126.9, 124.9, 122.3, 111.7, 99.8, 71.1, 62.2, 18.0, 12.0.

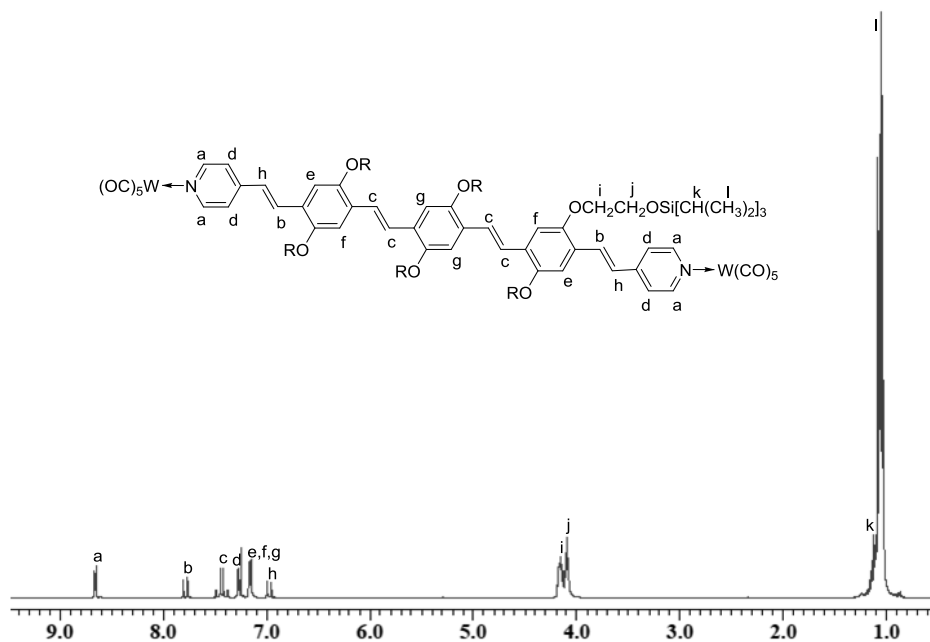

**Figure S1-9.**  $^1\text{H}$  NMR spectrum (in  $\text{CDCl}_3$  at  $25\text{ }^\circ\text{C}$ ) of  $[\text{W}(\text{CO})_5]_2\text{-(3PV-Py}_2\text{)}$ .

$^1\text{H}$  NMR ( $\text{CDCl}_3$  at  $25\text{ }^\circ\text{C}$ ):  $\delta$  8.67 (d, 4H), 7.80 (d, 2H), 7.47 (d, 2H), 7.42 (d, 2H), 7.28 (d, 4H), 7.18 (s, 2H), 7.17 (s, 2H), 7.16 (s, 2H), 6.98 (d, 2H), 4.18 (m, 12H), 4.09 (m, 12H), 1.13 (m, 18H), 1.08 (m, 108H).

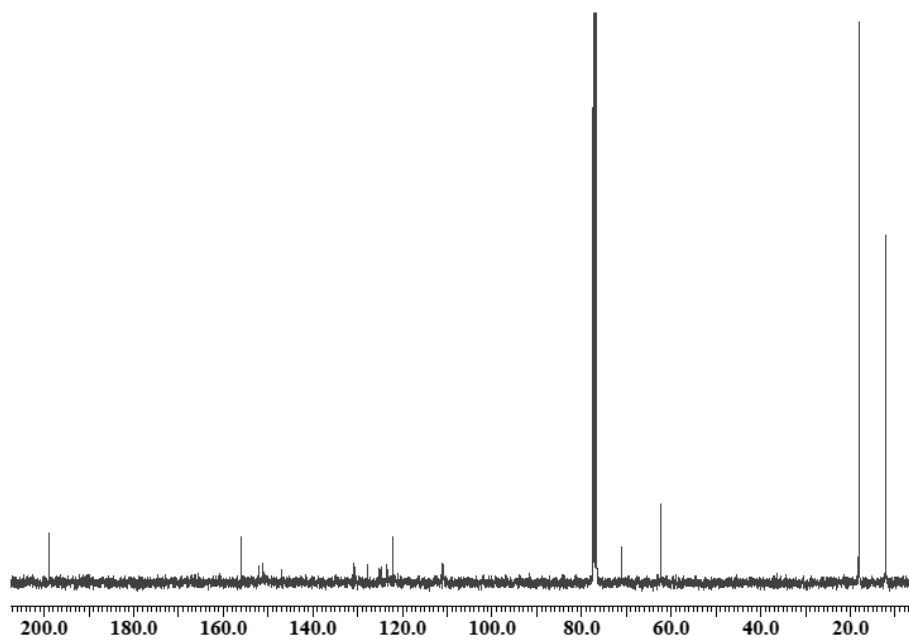

**Figure S1-10.**  $^{13}\text{C}$  NMR spectrum (in  $\text{CDCl}_3$  at  $25\text{ }^\circ\text{C}$ ) of  $[\text{W}(\text{CO})_5]_2\text{-(3PV-Py}_2\text{)}$ .

$^{13}\text{C}$  NMR ( $\text{CDCl}_3$  at  $25\text{ }^\circ\text{C}$ ):  $\delta$  198.9, 155.8, 151.9, 151.1, 151.0, 146.9, 130.9, 130.4, 127.8, 125.2, 125.0, 124.5, 123.4, 122.2, 110.8, 71.0, 62.3, 18.0, 12.0.

1-2. IR spectra for  $[\text{W}(\text{CO})_5]_2\text{-Bpy}$  (1),  $[\text{W}(\text{CO})_5]_2\text{-(1PV-Py}_2)$  (2), and  $[\text{W}(\text{CO})_5]_2\text{-(3PV-Py}_2)$  (3).

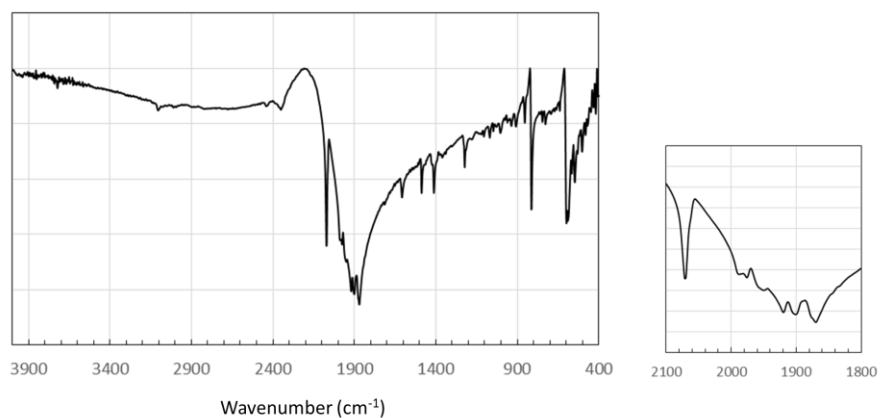

**Figure S1-11.** FT-IR spectrum for  $[\text{W}(\text{CO})_5]_2\text{-Bpy}$  (1). IR (KBr) ( $\text{cm}^{-1}$ ): 2072 (m)  $\nu_{\text{CO}}$ , 1975 (w)  $\nu_{\text{CO}}$ , 1950 (w)  $\nu_{\text{CO}}$ , 1919 (s)  $\nu_{\text{CO}}$ , 1900 (s)  $\nu_{\text{CO}}$ , 1869 (s)  $\nu_{\text{CO}}$ .

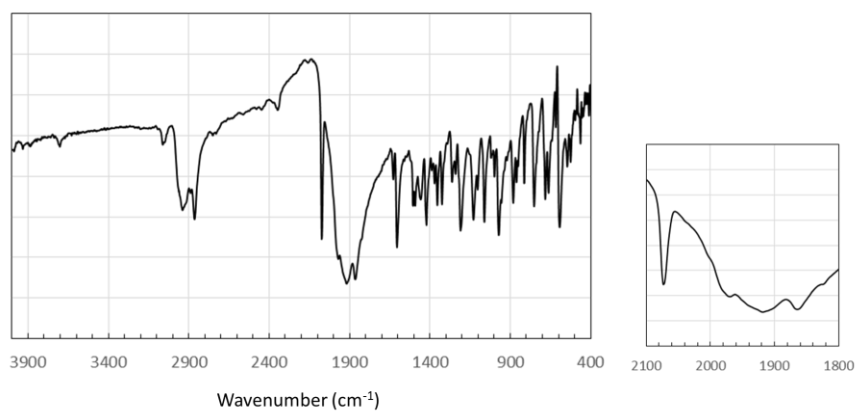

**Figure S1-12.** FT-IR spectrum for  $[\text{W}(\text{CO})_5]_2\text{-(1PV-Py}_2)$  (2). IR (KBr) ( $\text{cm}^{-1}$ ): 2073 (m)  $\nu_{\text{CO}}$ , 1969 (w)  $\nu_{\text{CO}}$ , 1919 (s, br)  $\nu_{\text{CO}}$ , 1865 (s)  $\nu_{\text{CO}}$ .

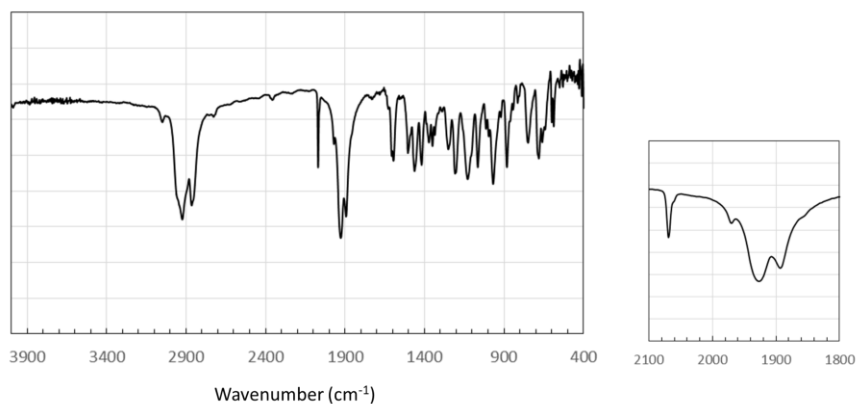

**Figure S1-13.** FT-IR spectrum for  $[\text{W}(\text{CO})_5]_2\text{-(3PV-Py}_2)$  (3). IR (KBr) ( $\text{cm}^{-1}$ ): 2070 (m)  $\nu_{\text{CO}}$ , 1969 (w)  $\nu_{\text{CO}}$ , 1927 (s, br)  $\nu_{\text{CO}}$ , 1894 (s)  $\nu_{\text{CO}}$ .

2. Additional figures and table for explanation (crystallographic analysis).

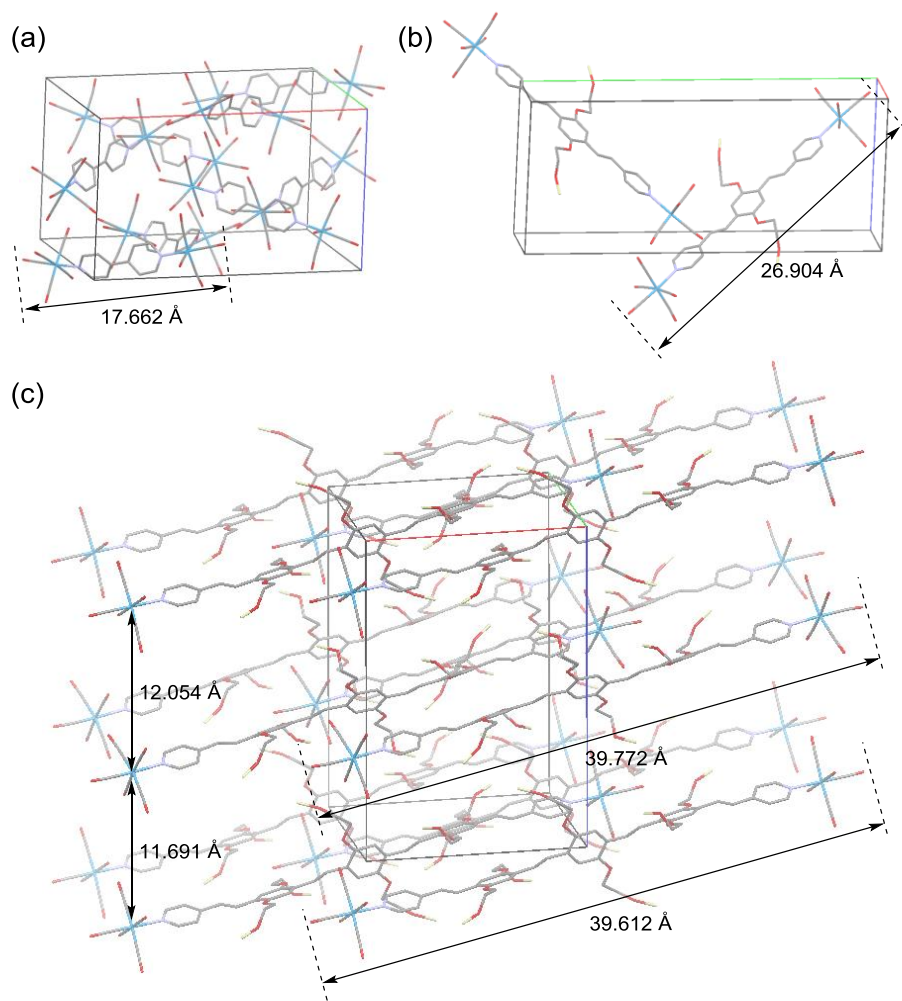

**Figure S2.** Molecular packings of (a)  $[\text{W}(\text{CO})_5]_2\text{-Bpy}$  (1), (b)  $[\text{W}(\text{CO})_5]_2\text{-(1PV-Py}_2)$  (2), (c)  $[\text{W}(\text{CO})_5]_2\text{-(3PV-Py}_2)$  (3) in the crystal unit cell. H atoms and isopropyl groups are omitted for clarity.



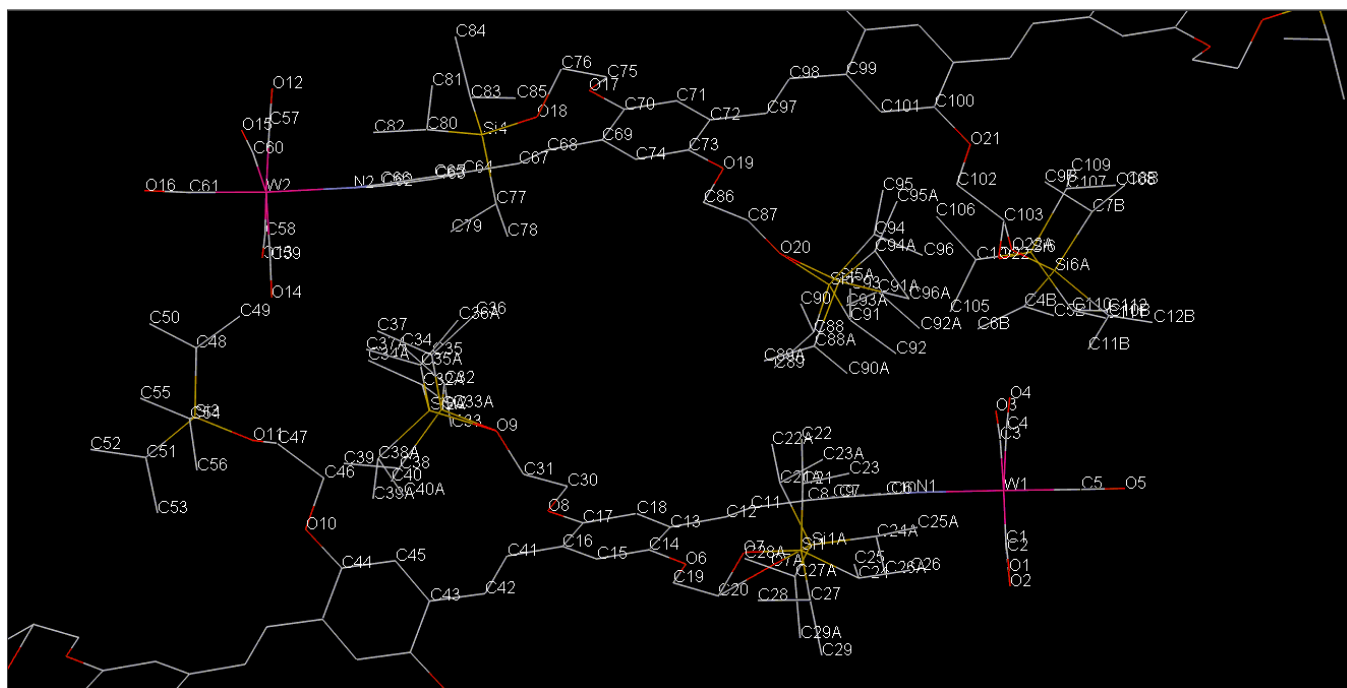

**Figure S3.** Disordered O, Si, and C atoms of OSi(*i*-Pr)<sub>3</sub> groups in [W(CO)<sub>5</sub>]<sub>2</sub>-(3PV-Py<sub>2</sub>) (**3**). The detail parameters including the occupancy of each atoms were shown in Table S1 (next page).

**Table S1.** Atomic coordinates and  $B_{iso}/B_{eq}$  and occupancy

| atom | x          | y           | z          | $B_{eq}$ | occ       |
|------|------------|-------------|------------|----------|-----------|
| C24  | 0.7638(13) | -0.5047(11) | 0.0829(11) | 8.7(4)   | 0.632(13) |
| C25  | 0.783(2)   | -0.4274(15) | 0.0786(17) | 12.3(8)  | 0.632(13) |
| C26  | 0.8395(17) | -0.5733(15) | 0.1007(12) | 9.7(6)   | 0.632(13) |
| Si1  | 0.6483(9)  | -0.5019(9)  | 0.1240(6)  | 6.8(2)   | 0.632(13) |
| O7   | 0.5651(12) | -0.4219(8)  | 0.1105(6)  | 7.2(3)   | 0.632(13) |
| C27  | 0.6363(16) | -0.5895(12) | 0.0916(9)  | 8.3(4)   | 0.632(13) |
| C28  | 0.5316(17) | -0.5926(15) | 0.1019(11) | 8.8(5)   | 0.632(13) |
| C29  | 0.668(2)   | -0.5797(17) | 0.0251(10) | 10.5(6)  | 0.632(13) |
| C21  | 0.636(2)   | -0.5285(11) | 0.2049(8)  | 8.4(4)   | 0.632(13) |
| C22  | 0.654(3)   | -0.4685(16) | 0.2381(13) | 12.2(8)  | 0.632(13) |
| C23  | 0.697(2)   | -0.6082(14) | 0.2294(11) | 11.1(8)  | 0.632(13) |
| C21A | 0.603(3)   | -0.496(2)   | 0.2012(12) | 8.5(5)   | 0.368(13) |
| C22A | 0.612(3)   | -0.424(3)   | 0.225(2)   | 9.7(8)   | 0.368(13) |
| C23A | 0.659(4)   | -0.568(3)   | 0.239(2)   | 11.1(10) | 0.368(13) |
| C27A | 0.609(2)   | -0.577(2)   | 0.1172(16) | 8.3(5)   | 0.368(13) |
| C28A | 0.508(2)   | -0.575(3)   | 0.146(2)   | 9.9(8)   | 0.368(13) |
| C29A | 0.614(3)   | -0.603(3)   | 0.0548(18) | 9.2(7)   | 0.368(13) |
| O7A  | 0.6221(17) | -0.4144(14) | 0.0877(13) | 8.3(5)   | 0.368(13) |
| Si1A | 0.6682(13) | -0.4986(16) | 0.1273(11) | 6.7(3)   | 0.368(13) |
| C24A | 0.7964(16) | -0.5024(19) | 0.1253(16) | 8.3(6)   | 0.368(13) |
| C25A | 0.847(2)   | -0.582(2)   | 0.149(2)   | 10.2(11) | 0.368(13) |
| C26A | 0.832(3)   | -0.463(2)   | 0.0714(16) | 7.8(7)   | 0.368(13) |
| Si2  | 0.2135(6)  | 0.2579(4)   | 0.1384(4)  | 3.18(11) | 0.645(17) |
| C38  | 0.1382(12) | 0.2694(9)   | 0.0782(8)  | 5.9(3)   | 0.645(17) |
| C39  | 0.0549(13) | 0.3396(11)  | 0.0747(11) | 8.0(5)   | 0.645(17) |
| C40  | 0.096(2)   | 0.1971(15)  | 0.0854(17) | 9.1(8)   | 0.645(17) |
| C35  | 0.1737(9)  | 0.2148(9)   | 0.2127(6)  | 4.2(3)   | 0.645(17) |
| C36  | 0.2514(12) | 0.1960(13)  | 0.2548(8)  | 4.7(3)   | 0.645(17) |

|      |            |             |            |          |           |
|------|------------|-------------|------------|----------|-----------|
| C37  | 0.0789(13) | 0.2571(14)  | 0.2383(9)  | 7.3(5)   | 0.645(17) |
| C32  | 0.2525(11) | 0.3488(7)   | 0.1417(6)  | 4.4(3)   | 0.645(17) |
| C33  | 0.2839(17) | 0.3859(12)  | 0.0813(8)  | 5.2(4)   | 0.645(17) |
| C34  | 0.1866(13) | 0.4088(9)   | 0.1755(8)  | 6.0(4)   | 0.645(17) |
| C32A | 0.214(2)   | 0.3633(17)  | 0.140(2)   | 7.2(6)   | 0.355(17) |
| C33A | 0.288(4)   | 0.396(3)    | 0.101(2)   | 8.6(11)  | 0.355(17) |
| C34A | 0.121(3)   | 0.407(3)    | 0.166(2)   | 10.4(11) | 0.355(17) |
| C35A | 0.150(2)   | 0.210(2)    | 0.2051(14) | 6.9(5)   | 0.355(17) |
| C36A | 0.219(2)   | 0.202(3)    | 0.2505(19) | 6.2(7)   | 0.355(17) |
| C37A | 0.069(3)   | 0.282(3)    | 0.213(2)   | 9.9(9)   | 0.355(17) |
| C39A | 0.1091(19) | 0.3221(19)  | 0.0346(13) | 6.3(5)   | 0.355(17) |
| C40A | 0.119(3)   | 0.192(2)    | 0.069(3)   | 5.7(6)   | 0.355(17) |
| C38A | 0.096(2)   | 0.2710(17)  | 0.0930(13) | 6.8(5)   | 0.355(17) |
| Si2A | 0.1928(15) | 0.2655(13)  | 0.1375(11) | 5.9(4)   | 0.355(17) |
| Si6  | 1.2348(4)  | -0.1031(3)  | 0.3001(3)  | 3.60(11) | 0.538(9)  |
| O22  | 1.1536(9)  | -0.1495(10) | 0.3117(5)  | 5.2(3)   | 0.538(9)  |
| C110 | 1.3062(13) | -0.1442(11) | 0.2389(9)  | 4.9(3)   | 0.538(9)  |
| C111 | 1.345(3)   | -0.2191(19) | 0.245(2)   | 7.4(6)   | 0.538(9)  |
| C112 | 1.3923(14) | -0.1032(14) | 0.2203(9)  | 6.0(4)   | 0.538(9)  |
| C107 | 1.3007(10) | -0.1050(9)  | 0.3640(6)  | 3.6(2)   | 0.538(9)  |
| C108 | 1.370(2)   | -0.1787(15) | 0.3786(18) | 4.2(4)   | 0.538(9)  |
| C109 | 1.3333(12) | -0.0392(10) | 0.3648(6)  | 3.6(3)   | 0.538(9)  |
| C104 | 1.1657(11) | -0.0009(9)  | 0.2738(7)  | 4.4(3)   | 0.538(9)  |
| C105 | 1.1200(14) | 0.0023(11)  | 0.2201(9)  | 4.9(4)   | 0.538(9)  |
| C106 | 1.0962(12) | 0.0338(10)  | 0.3203(8)  | 5.0(3)   | 0.538(9)  |
| Si6A | 1.2748(6)  | -0.1257(5)  | 0.2812(4)  | 5.61(17) | 0.462(9)  |
| O22A | 1.1805(12) | -0.1466(13) | 0.3180(6)  | 5.7(3)   | 0.462(9)  |
| C10B | 1.343(4)   | -0.239(2)   | 0.252(3)   | 7.3(5)   | 0.462(9)  |
| C11B | 1.296(3)   | -0.260(2)   | 0.2243(17) | 10.1(8)  | 0.462(9)  |
| C12B | 1.439(2)   | -0.2198(18) | 0.2307(15) | 8.4(7)   | 0.462(9)  |
| C7B  | 1.3507(16) | -0.1116(15) | 0.3353(10) | 5.8(4)   | 0.462(9)  |
| C8B  | 1.390(3)   | -0.179(2)   | 0.378(3)   | 6.7(8)   | 0.462(9)  |

|      |            |             |            |          |           |
|------|------------|-------------|------------|----------|-----------|
| C9B  | 1.291(2)   | -0.016(2)   | 0.3511(17) | 8.6(7)   | 0.462(9)  |
| C4B  | 1.251(2)   | -0.0367(18) | 0.2228(13) | 7.6(5)   | 0.462(9)  |
| C6B  | 1.172(2)   | -0.007(2)   | 0.1984(18) | 9.6(9)   | 0.462(9)  |
| C5B  | 1.324(2)   | -0.0041(18) | 0.1975(13) | 7.7(6)   | 0.462(9)  |
| Si5  | 0.7843(6)  | -0.2392(5)  | 0.3401(4)  | 4.54(13) | 0.656(11) |
| C88  | 0.7324(15) | -0.3043(11) | 0.3086(8)  | 7.6(4)   | 0.656(11) |
| C89  | 0.678(2)   | -0.246(2)   | 0.2599(14) | 11.5(8)  | 0.656(11) |
| C90  | 0.6852(18) | -0.3551(13) | 0.3564(10) | 9.4(6)   | 0.656(11) |
| C94  | 0.8476(12) | -0.2982(9)  | 0.4037(7)  | 6.0(3)   | 0.656(11) |
| C95  | 0.8809(15) | -0.2476(14) | 0.4368(10) | 8.2(5)   | 0.656(11) |
| C96  | 0.9178(15) | -0.3722(12) | 0.3914(10) | 8.9(6)   | 0.656(11) |
| C91  | 0.8492(13) | -0.1865(10) | 0.2823(7)  | 6.8(3)   | 0.656(11) |
| C92  | 0.9225(18) | -0.2390(18) | 0.2511(12) | 10.1(6)  | 0.656(11) |
| C93  | 0.873(2)   | -0.1184(13) | 0.2983(10) | 6.6(5)   | 0.656(11) |
| Si5A | 0.8053(15) | -0.2354(15) | 0.3410(11) | 6.8(4)   | 0.344(11) |
| C88A | 0.7523(19) | -0.258(2)   | 0.2802(16) | 7.4(5)   | 0.344(11) |
| C89A | 0.652(2)   | -0.260(3)   | 0.274(2)   | 6.3(7)   | 0.344(11) |
| C90A | 0.789(3)   | -0.343(2)   | 0.266(2)   | 9.4(9)   | 0.344(11) |
| C94A | 0.839(3)   | -0.3275(19) | 0.3933(14) | 8.2(5)   | 0.344(11) |
| C95A | 0.888(3)   | -0.306(3)   | 0.4383(18) | 9.0(8)   | 0.344(11) |
| C96A | 0.895(3)   | -0.368(3)   | 0.3451(19) | 9.3(6)   | 0.344(11) |
| C91A | 0.9005(16) | -0.1908(15) | 0.3096(12) | 5.4(4)   | 0.344(11) |
| C92A | 0.966(3)   | -0.247(3)   | 0.2758(19) | 7.7(8)   | 0.344(11) |
| C93A | 0.869(4)   | -0.1102(19) | 0.278(2)   | 6.6(8)   | 0.344(11) |

$$B_{eq} = 8/3 \pi^2 (U_{11}(aa^*)^2 + U_{22}(bb^*)^2 + U_{33}(cc^*)^2 + 2U_{12}(aa^*bb^*)\cos \gamma + 2U_{13}(aa^*cc^*)\cos \beta + 2U_{23}(bb^*cc^*)\cos \alpha)$$
